# Supplementary material for: Biostatistical Models for Predicting Mortality in Intensive Care Units
Source: Research Square preprint supplement (doi:10.21203/rs.3.rs-8465239/v1), 2026-01-16
Supplement: Supplementary file 1 [file df1d25cfbcc9f7faa84f42da.docx]

Dear participants

Please answer the following questions, keeping in mind that all information you provide will remain confidential and will be used for academic purposes only.

| **A: Independent Variable (Biostatistical Models)** | | | | | |
| --- | --- | --- | --- | --- | --- |
| **Input Variables** | | | | | |
|  | **1** | **2** | **3** | **4** | **5** |
| The model shows age, sex and comorbidities of patients all the time |  |  |  |  |  |
| Vital signs are always flashing including (heart rate, blood pressure, respiratory rate) |  |  |  |  |  |
| Indicators of labs values can be seen on screen all the time |  |  |  |  |  |
| The Glasgow Coma Scale (GCS) flashes when there are changes |  |  |  |  |  |
| Score are always available including APACHE, SAPS, or SOFA scores |  |  |  |  |  |
| **Model Type / Methodology** | | | | | |
| The models have the ability to determine interactions |  |  |  |  |  |
| They are able to capture nonlinear relationship |  |  |  |  |  |
| Models are all improved in their accuracy |  |  |  |  |  |
| They can also improve interpretability of results |  |  |  |  |  |
| They are based on logistic regression and XGBoost |  |  |  |  |  |
| **Calibration and Discrimination** | | | | | |
| Models adopted are reliable and able to predict risks |  |  |  |  |  |
| They are crucial for clinical utility |  |  |  |  |  |
| They depend on calibration plots |  |  |  |  |  |
| They can show the Area Under the Receiver Operating Characteristic Curve (AUROC) |  |  |  |  |  |
| They are based on Brier Score |  |  |  |  |  |
| **Temporal Resolution** | | | | | |
| Model incorporate time varying data |  |  |  |  |  |
| All predictions are updated over time |  |  |  |  |  |
| Model are based on real time updating |  |  |  |  |  |
| They utilize time-series analysis |  |  |  |  |  |
| They operate on recurrent neutral networks (RNNs) |  |  |  |  |  |
| **Handling of Missing Data** | | | | | |
| All models enjoy a good level of robustness and reliability |  |  |  |  |  |
| We make sure that models are able to avoid biased mortality prediction |  |  |  |  |  |
| Model can ignore and exclude incomplete cases and data |  |  |  |  |  |
| Model are always aware of lost information (imputation) |  |  |  |  |  |
| ICU environment must be able to handle missing data |  |  |  |  |  |
| **Interpretability** | | | | | |
| There is a continuous risk assessment |  |  |  |  |  |
| Models aren’t based on one-time scoring of data |  |  |  |  |  |
| The updating is always in real-time |  |  |  |  |  |
| This can increase trust and adoption |  |  |  |  |  |
| Modifiable factors are always up-to-date |  |  |  |  |  |
| **External Validation** | | | | | |
| Models can generate data outside dataset |  |  |  |  |  |
| Models can prevent overfitting |  |  |  |  |  |
| They present a broader clinical application |  |  |  |  |  |
| They can generate data from different patients at the same time |  |  |  |  |  |
| Generalizability is possible based on certain conditions that can’t be ignored |  |  |  |  |  |
| **Clinical Integration** | | | | | |
| All model fit with ICU's electronic health record (EHR) systems |  |  |  |  |  |
| They provide a real-time decision-making |  |  |  |  |  |
| They present highly integrated alert tools |  |  |  |  |  |
| They are based on clinicians point of care |  |  |  |  |  |
| They make sure that all tools are usable for predictions |  |  |  |  |  |
| **B: Dependent Variable (Predicting Mortality in (ICU)** | | | | | |
| ICU environment depends highly on biostatistical models |  |  |  |  |  |
| All ICU’s tasks are complex and must be maintained in a developed approach |  |  |  |  |  |
| Predicting patients’ risk of death is highly crucial medical aid |  |  |  |  |  |
| Biostatical models can help ICU make decisions and allocate resources |  |  |  |  |  |
| Biostatical characteristics are crucial for effective ICU efforts |  |  |  |  |  |
| Predicting mortality rate is important when it comes to clinical integration |  |  |  |  |  |
